# Supplementary material
Source: PubMed Central journal article supplement (PMC4073424)
Supplement: ASN.2013040435_ASN2013040435SupplementaryData1.pdf [file ASN.2013040435_ASN2013040435SupplementaryData1.pdf]

FOR ONLINE SUPPLEMENT

Supplemental Table 1. Extended multivariable models for cardiovascular disease, mortality, and composite outcomes

|                                    | CVD                      |             | Mortality                |             | Composite                |             |
|------------------------------------|--------------------------|-------------|--------------------------|-------------|--------------------------|-------------|
|                                    | Hazard Ratio<br>(95% CI) | P-<br>value | Hazard Ratio<br>(95% CI) | P-<br>value | Hazard Ratio<br>(95% CI) | P-<br>value |
| <b>Systolic BP (mmHg)</b>          |                          |             |                          |             |                          |             |
| <110                               | 0.74 (0.45-1.21)         | 0.23        | 0.48 (0.26-0.89)         | 0.019       | 0.65 (0.42-0.99)         | 0.045       |
| 110-119                            | 1.18 (0.83-1.67)         | 0.35        | 0.98 (0.66-1.43)         | 0.90        | 1.14 (0.86-1.52)         | 0.37        |
| 120-129                            | reference                | ---         | reference                | ---         | reference                | ---         |
| 130-139                            | 1.24 (0.91-1.68)         | 0.17        | 1.15 (0.84-1.57)         | 0.39        | 1.15 (0.89-1.47)         | 0.29        |
| 140-149                            | 1.43 (1.05-1.93)         | 0.022       | 1.15 (0.83-1.58)         | 0.40        | 1.28 (0.99-1.65)         | 0.059       |
| 150-159                            | 1.54 (1.09-2.18)         | 0.015       | 1.09 (0.75-1.59)         | 0.66        | 1.26 (0.94-1.69)         | 0.13        |
| 160+                               | 2.15 (1.54-2.99)         | <0.001      | 1.13 (0.77-1.63)         | 0.54        | 1.67 (1.26-2.23)         | <0.001      |
| <b>Diastolic BP (mmHg)</b>         |                          |             |                          |             |                          |             |
| <60                                | 1.50 (1.02-2.22)         | 0.040       | 1.41 (0.91-2.18)         | 0.13        | 1.36 (0.97-1.92)         | 0.074       |
| 60-69                              | 1.40 (1.08-1.81)         | 0.010       | 1.34 (1.01-1.77)         | 0.039       | 1.40 (1.13-1.74)         | 0.002       |
| 70-79                              | reference                | ---         | reference                | ---         | reference                | ---         |
| 80-89                              | 1.04 (0.81-1.32)         | 0.77        | 0.91 (0.70-1.20)         | 0.51        | 1.00 (0.81-1.23)         | 0.97        |
| 90-99                              | 0.95 (0.67-1.35)         | 0.77        | 1.07 (0.73-1.55)         | 0.74        | 1.03 (0.77-1.39)         | 0.82        |
| 100+                               | 0.94 (0.52-1.70)         | 0.85        | 0.99 (0.51-1.94)         | 0.98        | 0.86 (0.51-1.45)         | 0.57        |
| Age (per 5 yr)                     | 1.10 (1.05-1.16)         | <0.001      | 1.23 (1.16-1.30)         | <0.001      | 1.15 (1.10-1.20)         | <0.001      |
| Female sex                         | 0.88 (0.72-1.09)         | 0.24        | 1.06 (0.85-1.33)         | 0.60        | 0.94 (0.79-1.12)         | 0.52        |
| <b>Race</b>                        |                          |             |                          |             |                          |             |
| Black                              | 0.80 (0.62-1.04)         | 0.091       | 1.07 (0.82-1.40)         | 0.64        | 0.87 (0.70-1.08)         | 0.21        |
| Other                              | 0.90 (0.61-1.34)         | 0.61        | 0.96 (0.63-1.47)         | 0.85        | 1.13 (0.83-1.54)         | 0.45        |
| <b>Country</b>                     |                          |             |                          |             |                          |             |
| Canada                             | 0.79 (0.58-1.08)         | 0.14        | 0.65 (0.46-0.93)         | 0.018       | 0.72 (0.56-0.94)         | 0.017       |
| Brazil                             | 0.73 (0.51-1.06)         | 0.096       | 1.17 (0.78-1.75)         | 0.46        | 0.80 (0.58-1.09)         | 0.15        |
| Low dose vitamin                   | 0.95 (0.80-1.14)         | 0.61        | 0.99 (0.82-1.21)         | 0.95        | 0.95 (0.81-1.11)         | 0.50        |
| History of CVD                     | 2.13 (1.76-2.59)         | <0.001      | 1.47 (1.18-1.83)         | <0.001      | 1.79 (1.51-2.12)         | <0.001      |
| History of diabetes                | 2.34 (1.92-2.85)         | <0.001      | 1.85 (1.49-2.29)         | <0.001      | 2.04 (1.72-2.40)         | <0.001      |
| <b>Smoking status</b>              |                          |             |                          |             |                          |             |
| Current                            | 1.41 (1.06-1.88)         | 0.019       | 1.73 (1.27-2.36)         | <0.001      | 1.50 (1.17-1.92)         | 0.001       |
| Former                             | 1.10 (0.90-1.33)         | 0.35        | 1.33 (1.06-1.65)         | 0.012       | 1.22 (1.03-1.45)         | 0.019       |
| LDL cholesterol (per 10 mg/dL)     | 1.01 (0.98-1.04)         | 0.44        | 1.00 (0.97-1.03)         | 0.85        | 1.01 (0.99-1.04)         | 0.21        |
| HDL cholesterol (per 10 mg/dL)     | 0.93 (0.86-1.00)         | 0.050       | 0.94 (0.86-1.02)         | 0.14        | 0.90 (0.85-0.96)         | 0.003       |
| Triglycerides (per 50 mg/dL)       | 1.00 (0.98-1.02)         | 0.96        | 1.01 (0.99-1.02)         | 0.49        | 1.00 (0.99-1.01)         | 0.93        |
| Albumin Creatinine Ratio (Ln mg/g) | 1.09 (1.03-1.15)         | 0.002       | 1.22 (1.15-1.29)         | <0.001      | 1.12 (1.07-1.17)         | <0.001      |
| Body mass index                    | 0.89 (0.82-0.97)         | 0.006       | 0.92 (0.84-1.00)         | 0.054       | 0.89 (0.82-0.95)         | <0.001      |

|                                                                           |                  |        |                  |        |                  |        |
|---------------------------------------------------------------------------|------------------|--------|------------------|--------|------------------|--------|
| <b>eGFR (10 unit change for eGFR&lt;45 mL/min per 1.73 m<sup>2</sup>)</b> | 0.88 (0.83-0.94) | <0.001 | 0.87 (0.81-0.93) | <0.001 | 0.90 (0.85-0.95) | <0.001 |
| <b>eGFR (10 unit change for eGFR≥45 mL/min per 1.73 m<sup>2</sup>)</b>    | 1.00 (0.96-1.04) | 0.96   | 1.00 (0.96-1.05) | 0.86   | 0.99 (0.95-1.03) | 0.63   |
| <b>Transplant vintage</b>                                                 | 1.01 (0.99-1.03) | 0.18   | 1.02 (1.00-1.04) | 0.085  | 1.02 (1.00-1.03) | 0.011  |
| <b>Living donor</b>                                                       | 0.84 (0.69-1.01) | 0.067  | 0.63 (0.50-0.79) | <0.001 | 0.78 (0.66-0.92) | 0.004  |
| <b>ACE Inhibitor Use</b>                                                  | 0.97 (0.80-1.18) | 0.77   | 0.96 (0.77-1.19) | 0.68   | 0.94 (0.80-1.12) | 0.50   |
| <b>Angiotensin Receptor Blocker Use</b>                                   | 0.97 (0.75-1.25) | 0.80   | 0.82 (0.61-1.11) | 0.19   | 0.94 (0.76-1.18) | 0.61   |
| <b>Beta Blocker Use</b>                                                   | 1.05 (0.86-1.27) | 0.65   | 0.86 (0.69-1.06) | 0.15   | 0.98 (0.83-1.16) | 0.85   |
| <b>Dihydropyridine CA Channel Blocker Use</b>                             | 0.99 (0.82-1.20) | 0.90   | 1.00 (0.81-1.24) | 0.97   | 0.97 (0.82-1.15) | 0.73   |
| <b>Non-Dihydropyridine CA Channel Blocker Use</b>                         | 1.12 (0.80-1.58) | 0.51   | 1.19 (0.81-1.74) | 0.37   | 1.26 (0.95-1.68) | 0.11   |
| <b>Loop Diuretic Use</b>                                                  | 1.18 (0.97-1.44) | 0.10   | 1.39 (1.12-1.72) | 0.003  | 1.21 (1.02-1.44) | 0.025  |
| <b>Other Diuretic Use</b>                                                 | 1.41 (1.08-1.84) | 0.012  | 1.07 (0.78-1.47) | 0.69   | 1.24 (0.98-1.57) | 0.078  |

Supplemental Figure 1. Kaplan-Meier survival curves for (a) cardiovascular disease outcomes, (b) all-cause mortality, and (c) composite of CVD or all-cause mortality

(a) Cardiovascular disease

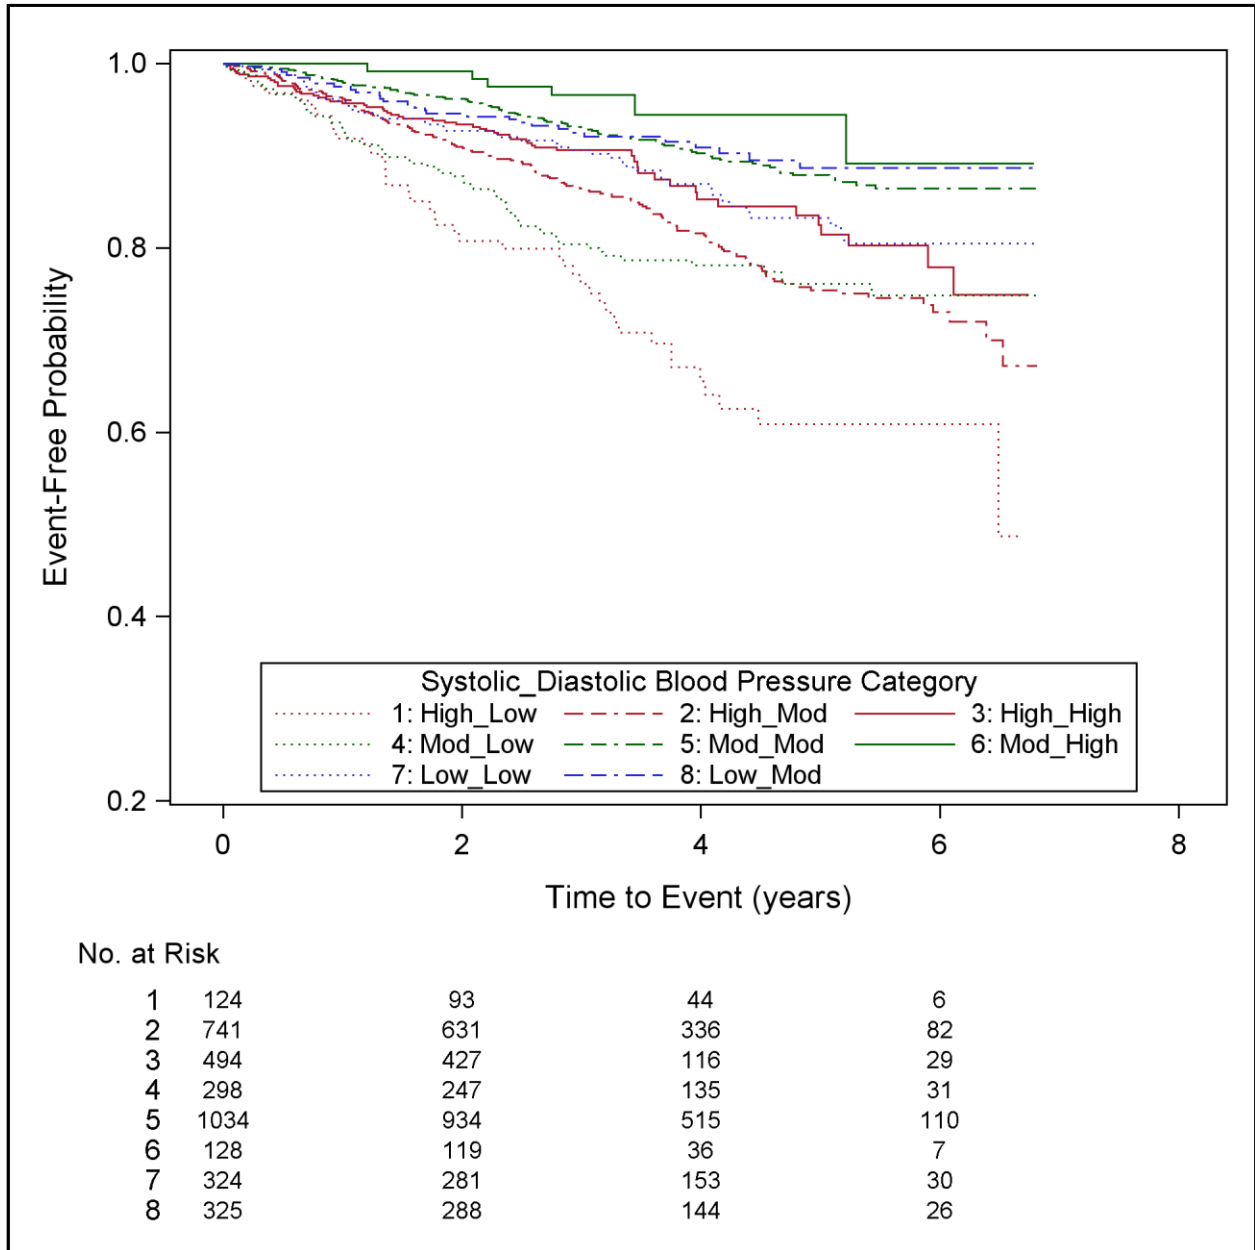

(b) All-cause mortality

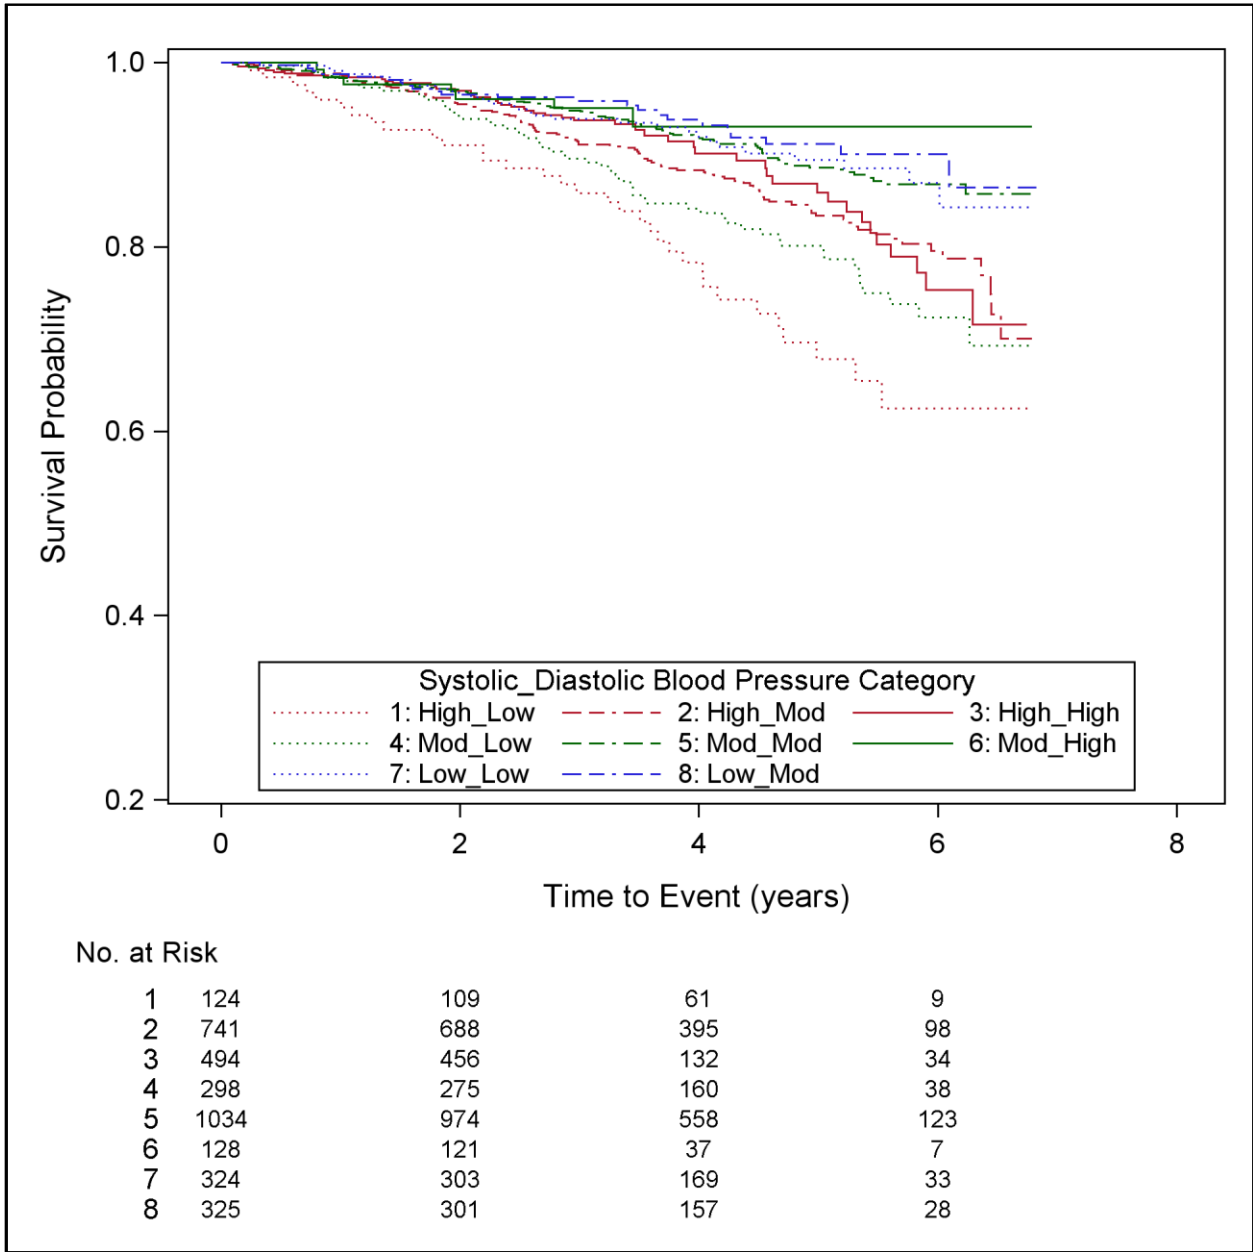

(c) Composite of CVD and all-cause mortality

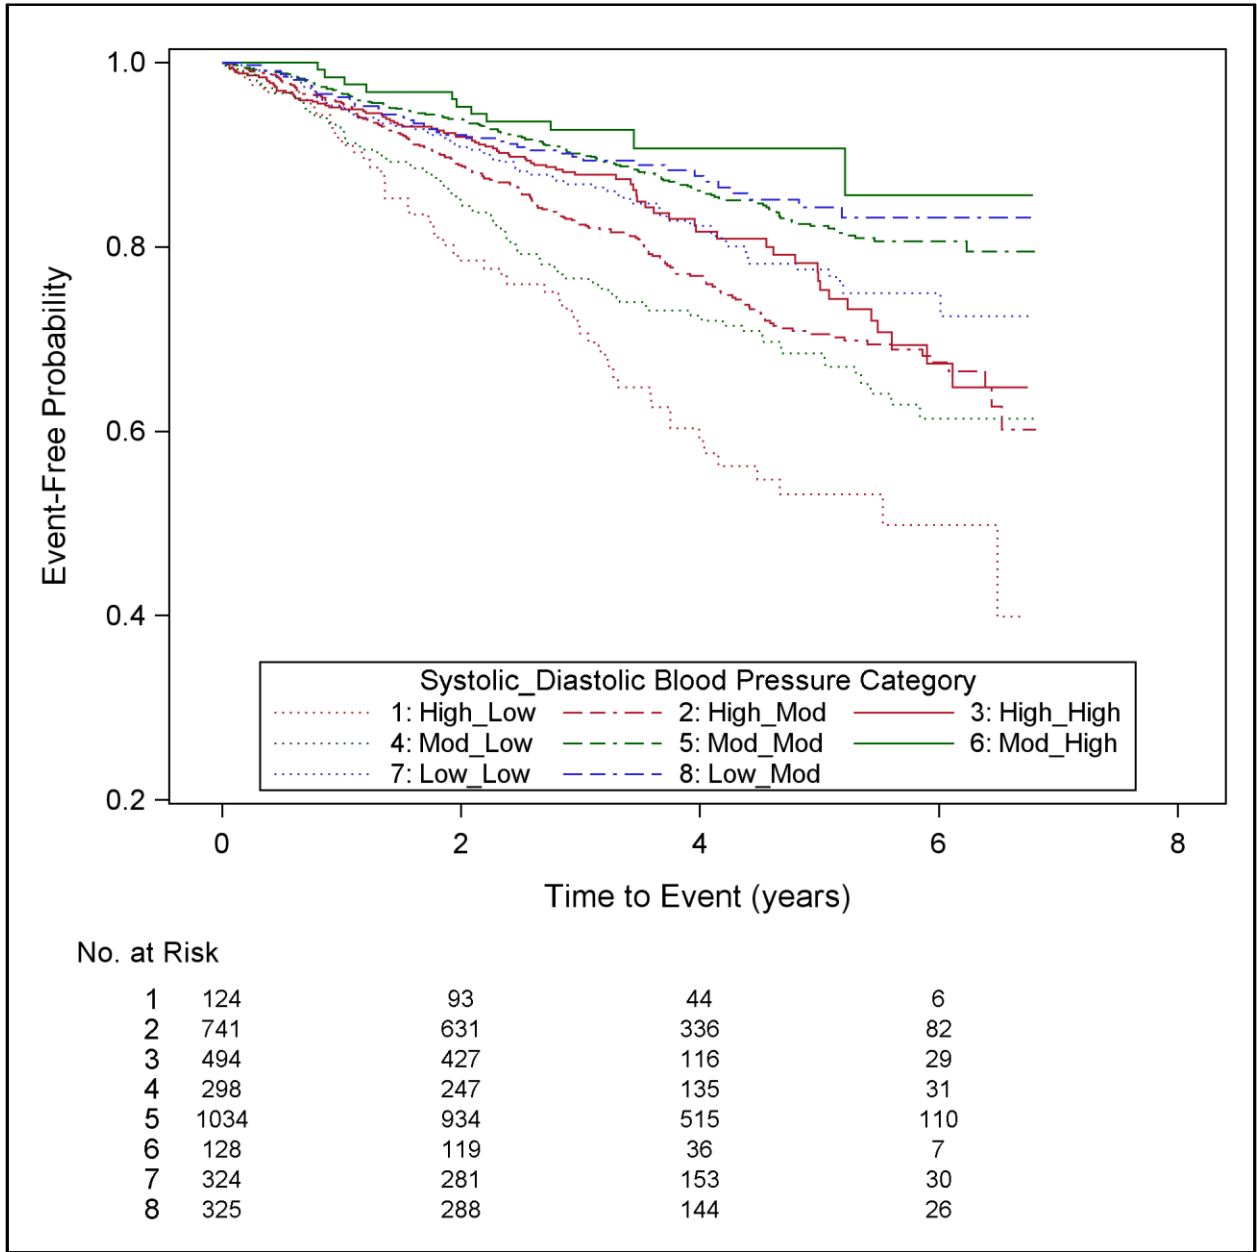

\*Blood pressure categories

| Systolic BP              | Diastolic BP           |
|--------------------------|------------------------|
| Low: < 120 mmHg          | Low: < 70 mmHg         |
| Moderate: 120 – 139 mmHg | Moderate: 70 – 89 mmHg |
| High: ≥ 140 mmHg         | High: ≥ 90 mmHg        |
